# Supplementary material
Source: publisher figshare collection journal article supplement (https://diabetesjournals.figshare.com/articles/dataset/_/14408822)
Supplement: Supplementary file 1 [file 1]

Supplementary Figure S1. Sample patient educational tool to increase insulin pump use.

INSULIN DELIVERY (VERSION 6 - OCTOBER 2020)

\*Continuous Glucose Monitor Insurance coverage for devices may vary.

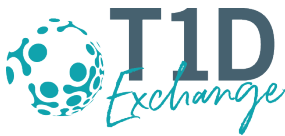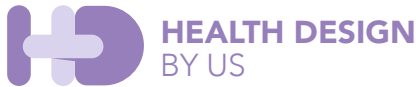

| PRODUCT                                                                                                                           | STEPS TO USE                                                                                                                                                                                                                                             | UPKEEP                                                    | VISIBILITY                                                                            | TUBING?                                                                                                               | LINK TO PHONE?                                                                                                                           | COMPATIBLE WITH CGM?*                                                                                                | BASAL ADJUSTMENTS?                                                                                                                                           | DATA VIEWING?                                                                                                                                | FEATURES                                                                                                                                    |
|-----------------------------------------------------------------------------------------------------------------------------------|----------------------------------------------------------------------------------------------------------------------------------------------------------------------------------------------------------------------------------------------------------|-----------------------------------------------------------|---------------------------------------------------------------------------------------|-----------------------------------------------------------------------------------------------------------------------|------------------------------------------------------------------------------------------------------------------------------------------|----------------------------------------------------------------------------------------------------------------------|--------------------------------------------------------------------------------------------------------------------------------------------------------------|----------------------------------------------------------------------------------------------------------------------------------------------|---------------------------------------------------------------------------------------------------------------------------------------------|
| <b>INJECTIONS</b><br>Vial & Syringe<br>          | <ul style="list-style-type: none"><li>• Check BG</li><li>• Count carbs</li><li>• Calculate dose</li><li>• Draw up insulin</li><li>• Inject dose</li></ul>                                                                                                | Use a new needle for each injection                       |    |                                    |                                                       |                                   |                                                                           |                                                           | Least expensive therapy option                                                                                                              |
| <b>INJECTIONS</b><br>Insulin Pen<br>             | <ul style="list-style-type: none"><li>• Check BG</li><li>• Count carbs</li><li>• Calculate dose</li><li>• Prime pen with 2 units</li><li>• Twist dial to draw up insulin</li><li>• Inject dose</li></ul>                                                 | Use a new pen needle for each injection                   |    |                                    |                                                       |                                   |                                                                           |                                                           |                                                                                                                                             |
| <b>INJECTIONS</b><br>InPen Smart Insulin Pen<br> | <ul style="list-style-type: none"><li>• Check BG</li><li>• Count carbs</li><li>• Calculate dose</li><li>• Prime pen with 2 units</li><li>• Twist dial to draw up insulin</li><li>• Inject dose</li></ul>                                                 | Use a new pen needle for each injection                   |    |                                    | <br>not all Android devices are compatible            | <br>Dexcom G5 & G6                |                                                                           | <br>View on mobile phone                                  | Reusable pen device with insulin cartridges; Mobile app tracks active insulin, calculates doses, gives reminders; Can sync with some meters |
| <b>PUMP</b><br>Insulet Corp. Omnipod Dash<br>  | <ul style="list-style-type: none"><li>• Check BG</li><li>• Count carbs</li><li>• Enter BG</li><li>• Push touch screen to deliver insulin</li></ul>                                                                                                       | Fill pod with insulin and change pod every 2-3 days       |   | <br>Tubeless pod attached to body | <br>Display and View on iOS devices only             |                                  |                                                                          | <br>iOS auto. uploads to Glooko, plug into PC or Android | Waterproof pod; Omnipod Dash comes with a linked Bayer Contour glucose meter                                                                |
| <b>PUMP</b><br>Tandem t:slim X2<br>            | <ul style="list-style-type: none"><li>• Check BG</li><li>• Count carbs</li><li>• Enter BG</li><li>• Push touch screen button to deliver insulin</li></ul>                                                                                                | Change infusion set every 2-3 days; refill insulin supply |  | <br>Tube attached to body        |                                                     | <br>Dexcom G6                   | <br>Auto-dosing (Control IQ), predictive low glucose suspend (Basal IQ) | <br>Plug into PC to upload to t:connect                 | Device can be easily updated via Tandem Device Updater<br><br>Control IQ and Basal IQ require connection with Dexcom G6 CGM                 |
| <b>PUMP</b><br>Medtronic MiniMed 670G<br>      | <ul style="list-style-type: none"><li>• Check BG</li><li>• Count carbs</li><li>• Enter BG</li><li>• Push manual button to deliver insulin</li><li>• Calibrate sensor 2x per day and have at least 4 BG checks per day to use basal auto-dosing</li></ul> | Change infusion set every 2-3 days; refill insulin supply |  | <br>Tube attached to body        |                                                     | <br>Medtronic Guardian Sensor 3 | <br>Basal insulin auto-dosing, predictive low glucose suspend           | <br>Plug into PC                                        | Can be linked to Bayer Contour Next Link 2.4 meter                                                                                          |
| <b>PUMP</b><br>Medtronic MiniMed 770G<br>      | <ul style="list-style-type: none"><li>• Check BG</li><li>• Count carbs</li><li>• Enter BG</li><li>• Push manual button to deliver insulin</li><li>• Calibrate sensor 2x per day and have at least 4 BG checks per day to use basal auto-dosing</li></ul> | Change infusion set every 2-3 days; refill insulin supply |  | <br>Tube attached to body        | <br>via MiniMed Mobile App and CareLink Connect App | <br>Medtronic Guardian Sensor 3 | <br>Basal insulin auto-dosing, predictive low glucose suspend           | <br>Plug into PC or send data via app                   | Can be linked to Bayer Contour Next Link 2.4 meter                                                                                          |
